# Supplementary material for: Porous CoFe-LDH free-standing electrodes for high-performance asymmetric supercapacitors
Source: Royal Society of Chemistry journal article supplement (doi:10.1039/d5nj01169h), 2025-01-01
Supplement: d5nj01169h1.pdf [file d5nj01169h1.pdf]

## Supporting Information

### **Porous CoFe-LDH free-standing electrodes for high-performance asymmetric supercapacitors**

Juan Chen,<sup>a</sup> Yanhua Sun,<sup>a</sup> Zi Li,<sup>a</sup> Guojun Yuan,<sup>\*a</sup> Guangmei Han<sup>\*b</sup>

<sup>a</sup> School of Environment and Life Health, Anhui Vocational and Technical College, Hefei, 230011 (China)

<sup>b</sup> Institute of Health Sciences and Technology, Institutes of Physical Sciences and Information Technology, Anhui University, Hefei, 230601 (China)

#### **Corresponding Authors**

**Guangmei Han** - Institute of Health Sciences and Technology, Institutes of Physical Sciences and Information Technology, Anhui University, Hefei, 230601 (China)

Email: gmhan@ahu.edu.cn

#### **Co-corresponding Author**

**Guojun Yuan**-School of Environment and Life Health, Anhui Vocational and Technical College, Hefei, 230011 (China)

Email: yuangj@uta.edu.cn

**Supplementary Figures:**

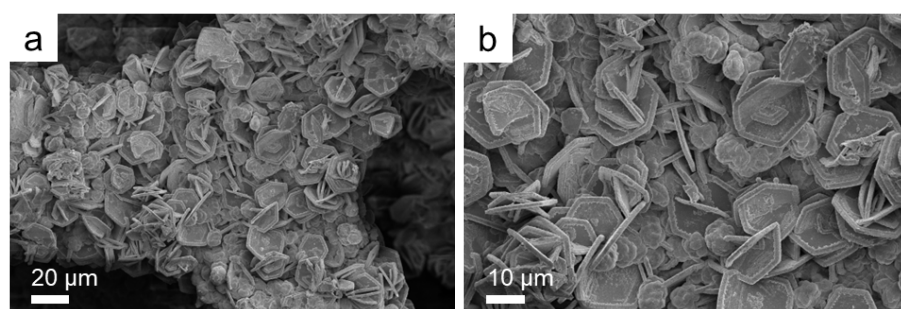

**Figure S1** The SEM images of CoFe-LDH/NF free-standing electrode

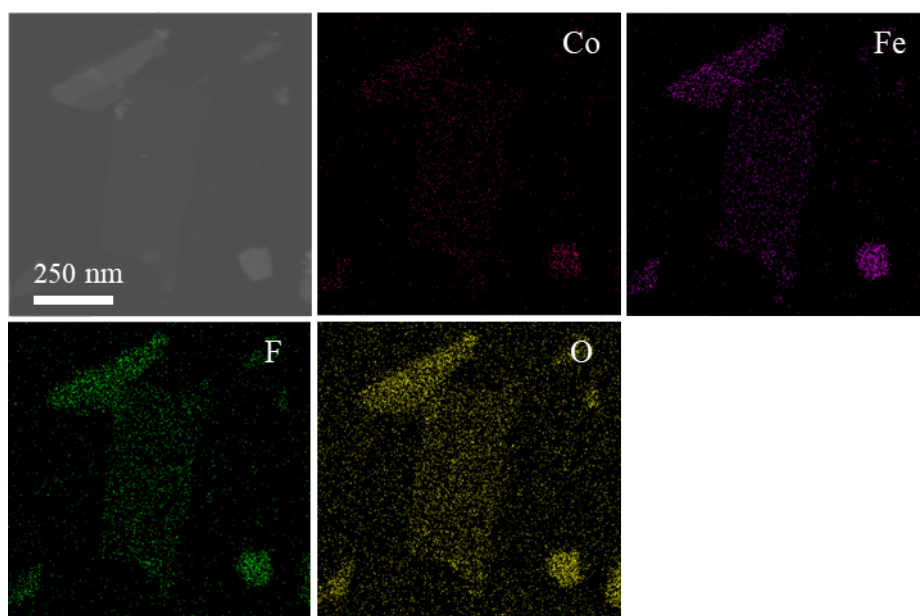

**Figure S2** HAADF-STEM and the corresponding EDX elemental mapping images of CoFe-LDH

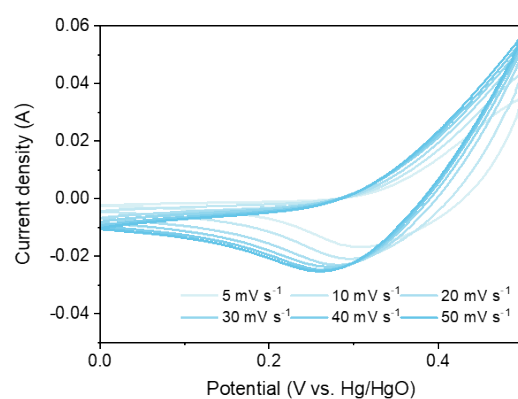

**Figure S3** The CV curves of Co<sub>1</sub>Fe<sub>3</sub>-LDH/NF at different scan rates

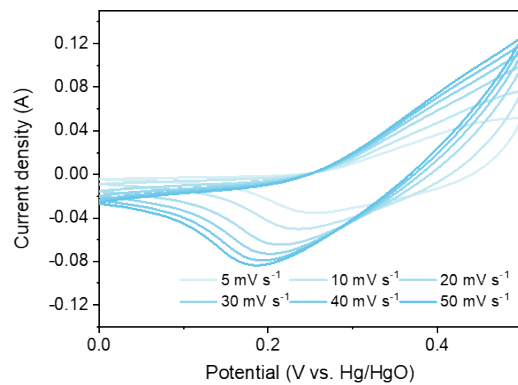

**Figure S4** The CV curves of Co<sub>2</sub>Fe<sub>2</sub>-LDH/NF at different scan rates

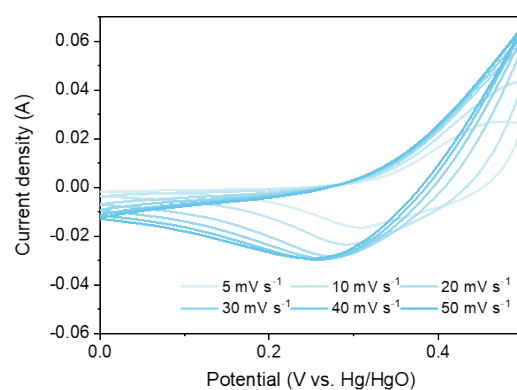

**Figure S5** The CV curves of Co<sub>3</sub>Fe<sub>1</sub>-LDH/NF at different scan rates

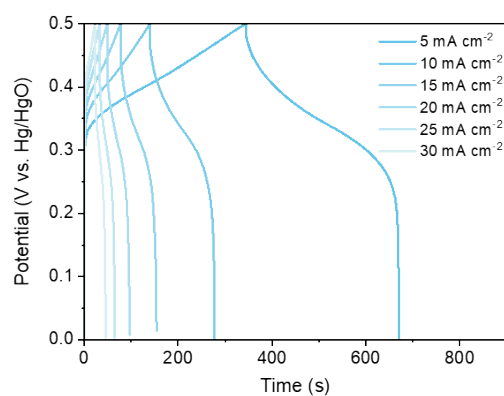

**Figure S6** The GCD curves of Co<sub>1</sub>Fe<sub>3</sub>-LDH /NF at different current densities

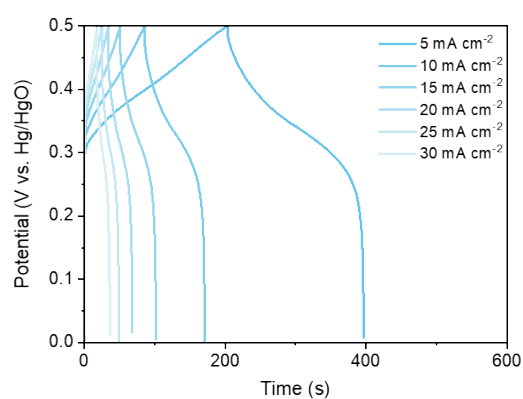

**Figure S7** The GCD curves of  $\text{Co}_3\text{Fe}_1\text{-LDH/NF}$  at different current densities

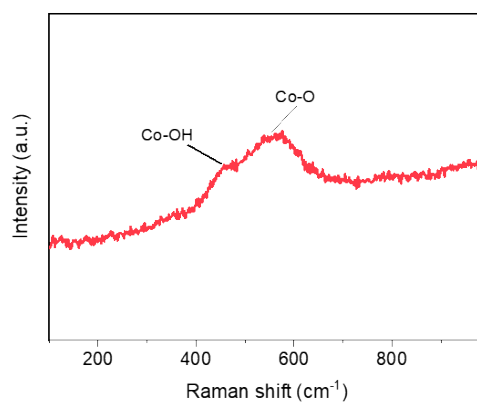

**Figure S8** The Raman spectrum of  $\text{Co}_2\text{Fe}_2\text{-LDH/NF}$  after 10000 charge/discharge cycles

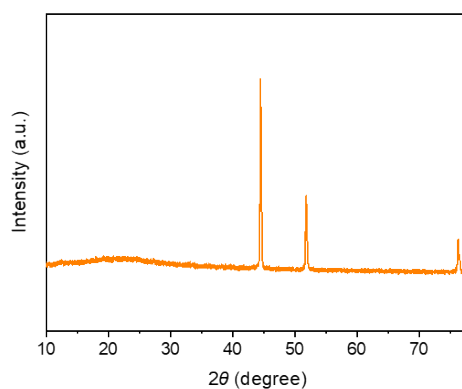

**Figure S9** The XRD pattern of Co<sub>2</sub>Fe<sub>2</sub>-LDH/NF after 10000 charge/discharge cycles

**Table S1** Comparison of electrochemical properties for LDHs based electrodes for supercapacitor devices

| Sample                                  | Electrolyte | Voltage<br>(V) | Specific<br>capacity<br>(mF cm <sup>-2</sup> ) | Energy<br>density<br>(mWh cm <sup>-2</sup> ) | Stability<br>(cycles) | Ref.      |
|-----------------------------------------|-------------|----------------|------------------------------------------------|----------------------------------------------|-----------------------|-----------|
| SN-NiCo-LDH@CNTs@NCF                    | KOH         | 1.6            | 1.99                                           | 0.617                                        | 5000                  | [50]      |
| NiCoAl <sub>0.1</sub> LDH               | KOH         | 2.0            | 1.566                                          | 0.84                                         | 150000                | [51]      |
| NiCo-LDH                                | KOH         | 1.7            | 876.0                                          | 5.61                                         | 10000                 | [52]      |
| CoSe <sub>2</sub> @NiCo-LDH             | KOH         | 1.6            | 510                                            | 183.0                                        | 5000                  | [53]      |
| Co(OH)F@NiCo-LDH                        | KOH         | 1.6            | 651.6                                          | 231.7                                        | 5000                  | [54]      |
| Co <sub>2</sub> Fe <sub>2</sub> -LDH/NF | KOH         | 1.6            | 953.1                                          | 338.9                                        | 10000                 | This work |
